# Supplementary material
Source: Springer Nature journal article supplement (https://www.springermedizin.de/resource/supplementary/12885_2009_2800_MOESM6_ESM.pdf/9461954)

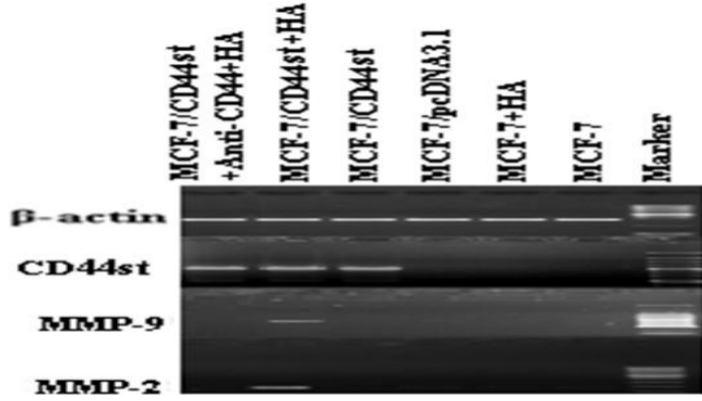

Supplement: MOESM6 [file 9461954]
